# Supplementary material for: MicroRNA-96 Promotes Schistosomiasis Hepatic Fibrosis in Mice by Suppressing Smad7
Source: PubMed Central journal article supplement — Mol Ther Methods Clin Dev. 2018 Oct 10;11:73–82. doi: 10.1016/j.omtm.2018.10.002 (PMC6214875; doi:10.1016/j.omtm.2018.10.002), 2018-10-10
Supplement: mmc1.pdf [file mmc1.pdf]

OMTM, Volume 11

## Supplemental Information

***MicroRNA-96 Promotes Schistosomiasis***

**Hepatic Fibrosis in Mice by Suppressing *Smad7***

Xufeng Luo, Dongmei Zhang, Jun Xie, Qin Su, Xing He, Ruipu Bai, Guangping Gao, and Weiqing Pan

**Fig. S1. Verification of hepatic fibrosis-relevant miRNA expression profiles.** qRT-PCR analysis of miRs expression level between the liver samples infected with 16 *S. japonicum* cercariae at day 0 (n=3) and day 50 (n=3).

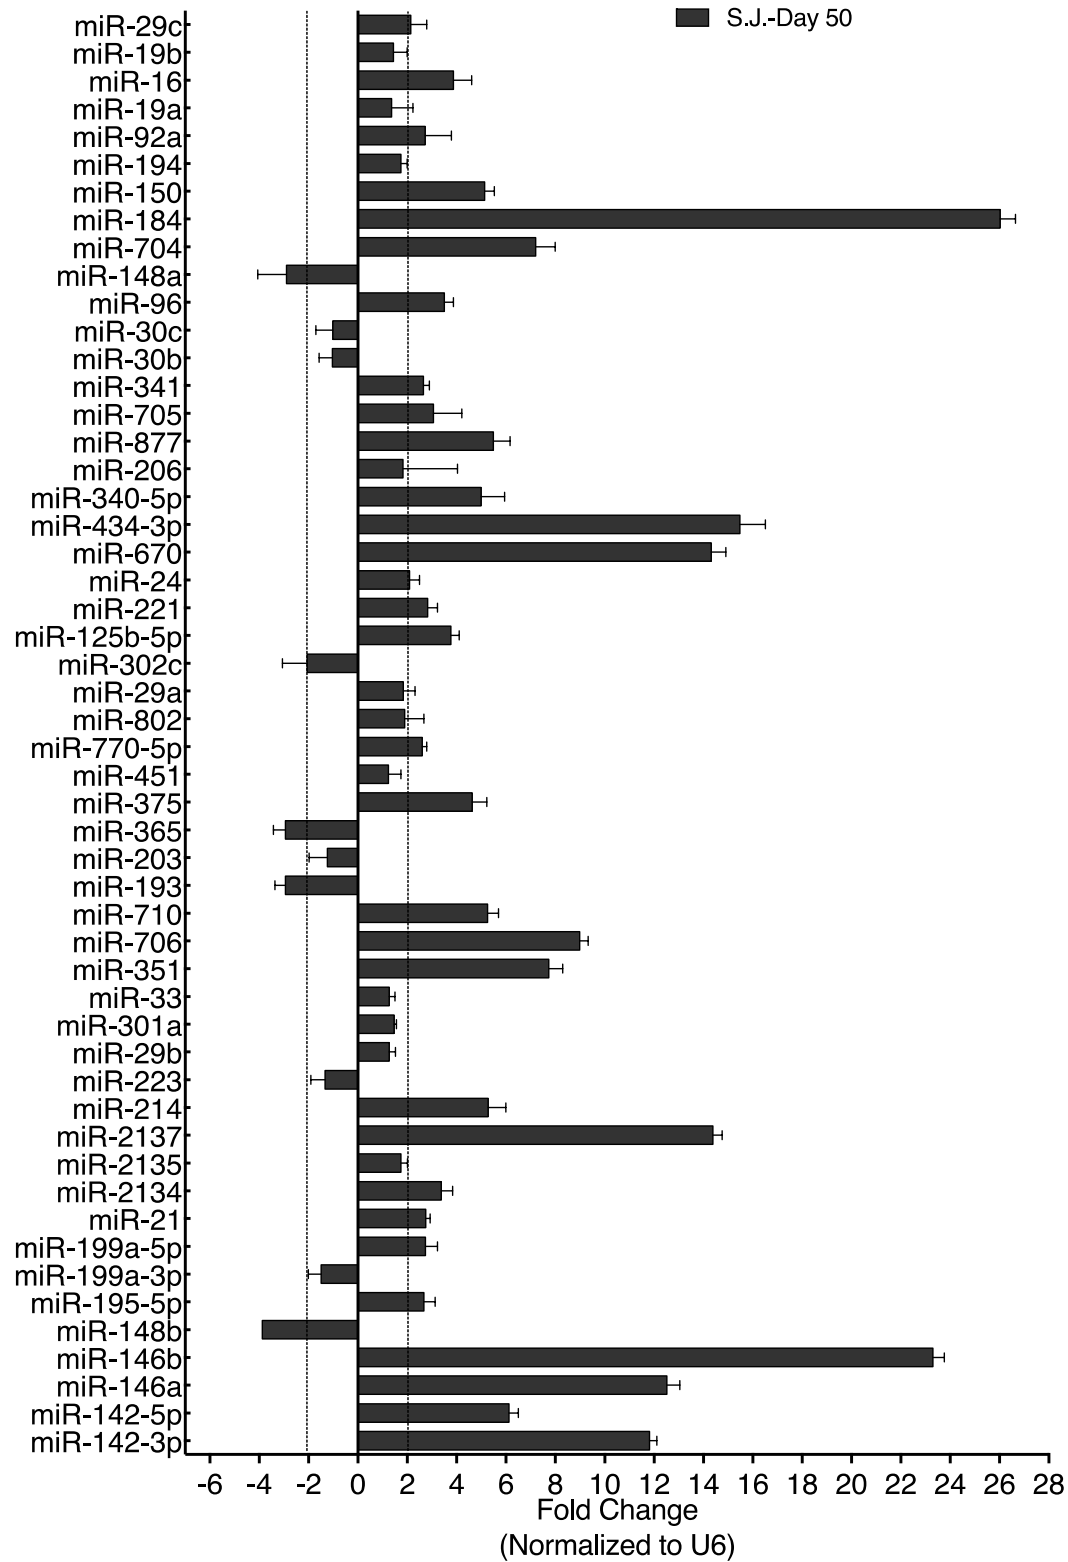

**Fig. S2. Verification of altered miRNA expression profiles.** qRT-PCR analysis of miRs expression level between the HSCs samples infected with 16 *S. japonicum* cercariae at day 0 (n=3) and day 50 (n=3).

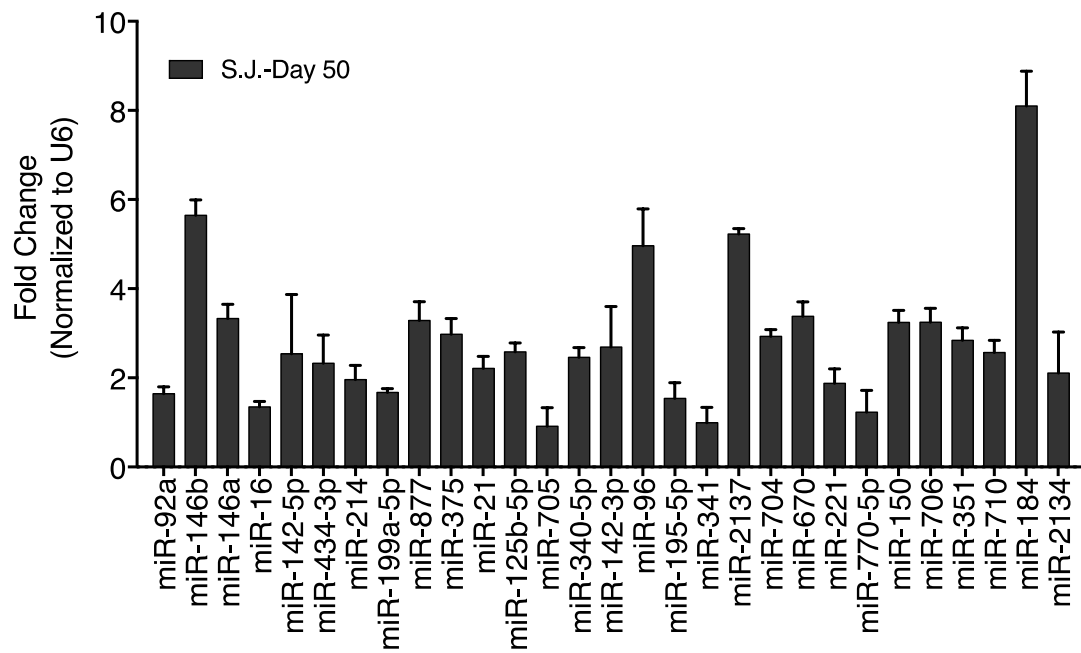

**Fig. S3. Predicted miR-96 bind sites in the 3'UTR of *Smad7*.** By microRNA targets prediction website: TargetScan, one conserved site of miR-96 (1429-1435) and two poorly conserved sites (507-513, 583-589) of miR-96 were predicted<sup>1</sup>.

Mouse SMAD7 ENST00000262158.2 3' UTR length: 1554

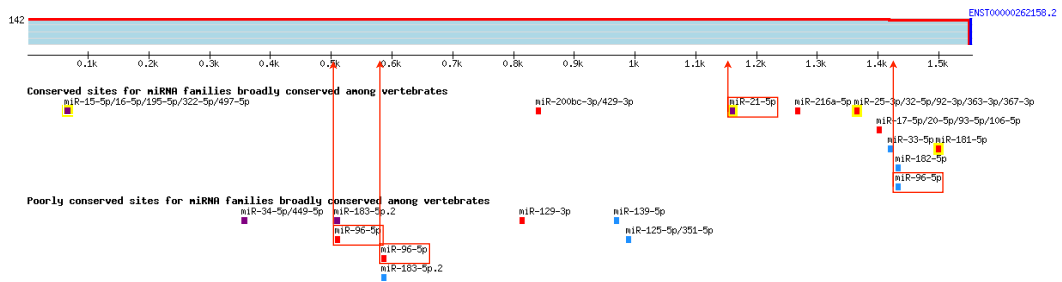

mmu-miR-96 Position 1429-1435 of SMAD7 3' UTR

MUT: 5' ... UAAAUGCAAUAACAAGGCTAAU...  
 WT: 5' ... UAAAUGCAAUAACAUGCCAAU...

miR-96: 3' UCGUUUUUACACGAUC--ACGGUUU

mmu-miR-96 Position 507-513 of SMAD7 3' UTR

MUT: 5' ... GCUGAGAGGCUCAATTGACCGATG...  
 WT: 5' ... GCUGAGAGGCUCAUAGUGCCAAG...

miR-96: 3' UCGUUUUUACACGAUCACGGUUU

mmu-miR-96 Position 583-589 of SMAD7 3' UTR

WT: 5' ... GCAGACUGGCAGCAGGUGCCAAG...

miR-96: 3' UCGUUUUUACACGAUCACGGUUU

**Fig. S4. Validation of the target site of miR-96 by the dual-luciferase reporter assays.** each histogram shows normalized mean value of relative luciferase activity from three independent experiments. Normalized luciferase activity in the NC-mimics was set to 100. WT: the vector containing the wild type sequence of the target site; Mut: the vector containing the target site mutant.

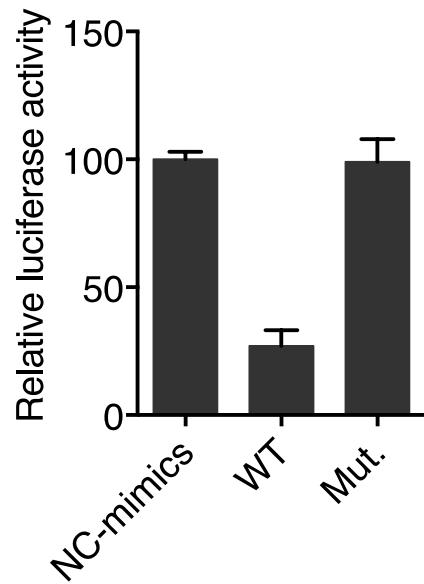

**Fig. S5. In vitro validation of rAAV vector plasmids expressing mmu-miR-96.** (a) MiR-96 sensor plasmid and pmiCHECK-3x96T was co-transfected with 10 to 500 ng of pAAV-miR-96 plasmids into HEK293 cells. (b) In the presence of 100 ng of pAAV-miR-96 plasmid, 5 to 500 ng of anti-miR-96 TuD was co-transfected with the miR-96 sensor plasmid into HEK293 cells. Twenty-four hours after transfection,  $\beta$ -Gal and Fluc levels were measured in the cellular lysates. The ratio of  $\beta$ -Gal and Fluc activities reflects the active miR-96 in the transfected HEK293 cells.

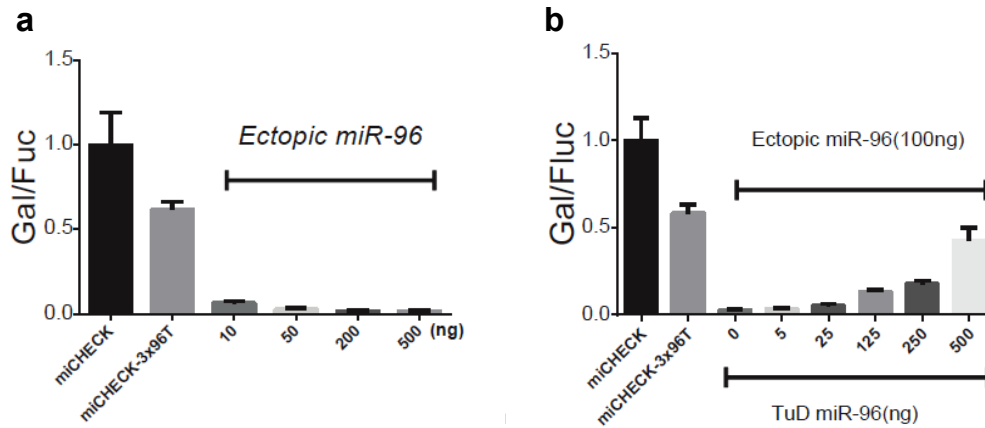

**Fig. S6. Validation of the target site of miR-96.** (a) RT-PCR analysis of *Smad7* expression in the HSC-T6 cell line transfected with miR-96-inhibitor (160nM), or the NC inhibitor. (b) Western blot analysis of *Smad7* expression in the HSC-T6 cell line treated as above. (c) RT-PCR analysis of expressions of *Smad7*, *Col1* and *Col3* in the HSC-T6 cell line transfected with miR-96-inhibitor, miR-21-inhibitor or the NC inhibitor.

Data were represented as mean  $\pm$  SD. \* $p < 0.05$ , \*\* $p < 0.01$ , compared between indicated groups.

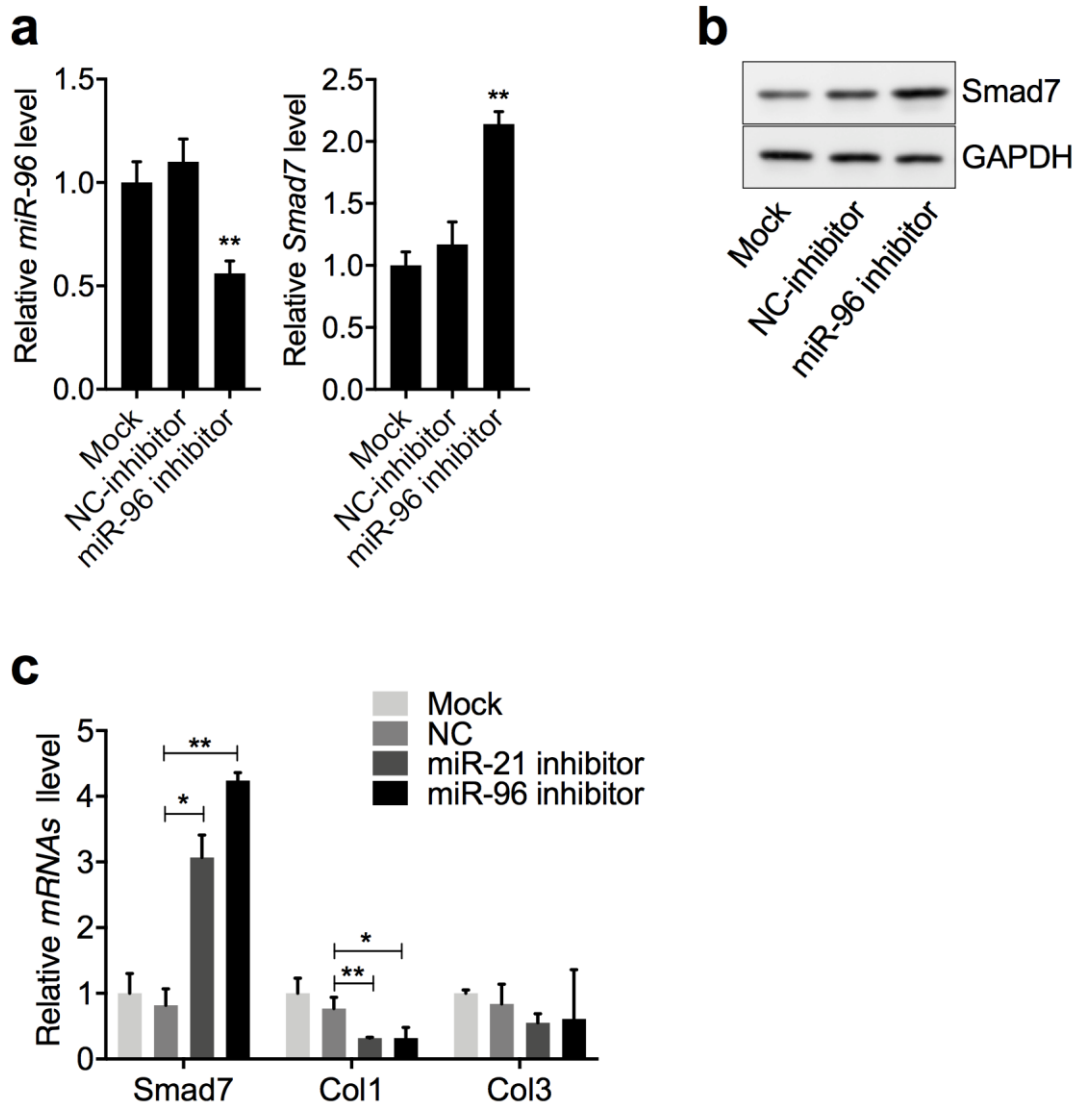

References:

1. Agarwal V, Bell GW, Nam J, Bartel DP. Predicting effective microRNA target sites in mammalian mRNAs. *eLife*, 4:e05005, (2015).
